# Supplementary material for: Prebiotic dimer and trimer peptide formation in gas-phase atmospheric nanoclusters of water
Source: Royal Society of Chemistry journal article supplement (doi:10.1039/d3cp02915h), 2023-01-01
Supplement: d3cp02915h1.zip [file d3cp02915h1.zip]

**Supporting Information for**

Prebiotic Peptide Formation in Atmospheric Nanoclusters of Water: From Glycine to Diglycine to Triglycine

Shannon E. Harold, Skyler L. Warf, George C. Shields*
Furman University Chemistry Department

Email: george.shields@furman.edu

**This PDF file includes:**

Supporting text

Figures S1 to S3

**Other supporting materials for this manuscript include the following:**

Dataset S1 contains xyz files for all transition states and monomers

Zip file: SupportingInformationZip.zip contains xyz files in relevant folder


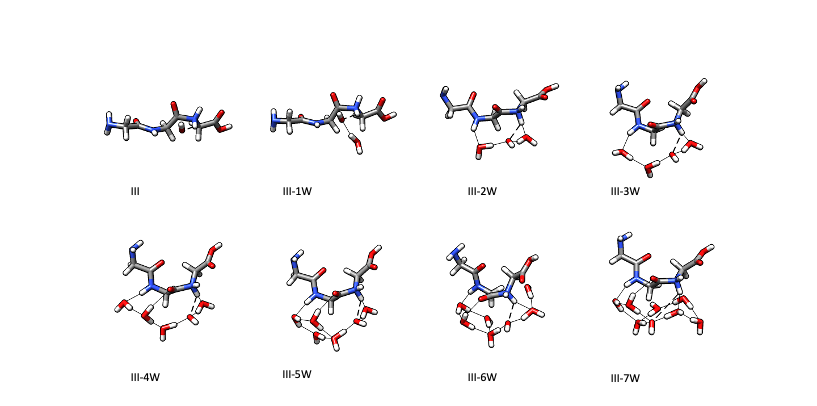


Fig. S1. The structures of *cis* N-to-C triglycine transition states in nanoclusters of water (w=0-7)


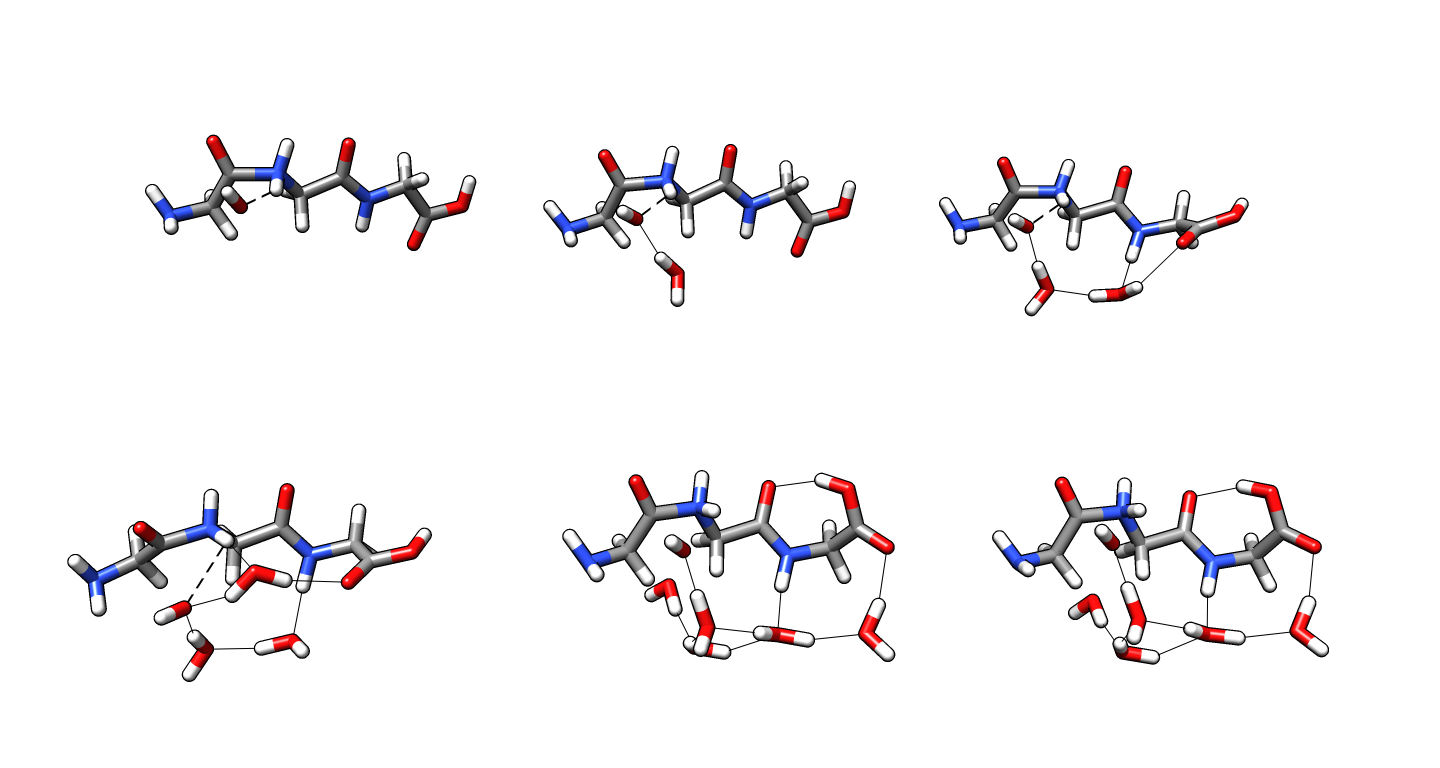


IV-3W

IV-5W

IV-4W

IV-2W

IV

IV-1W

Fig. S2. The structures of *cis* C-to-N triglycine transition states in nanoclusters of water (w=0-5)


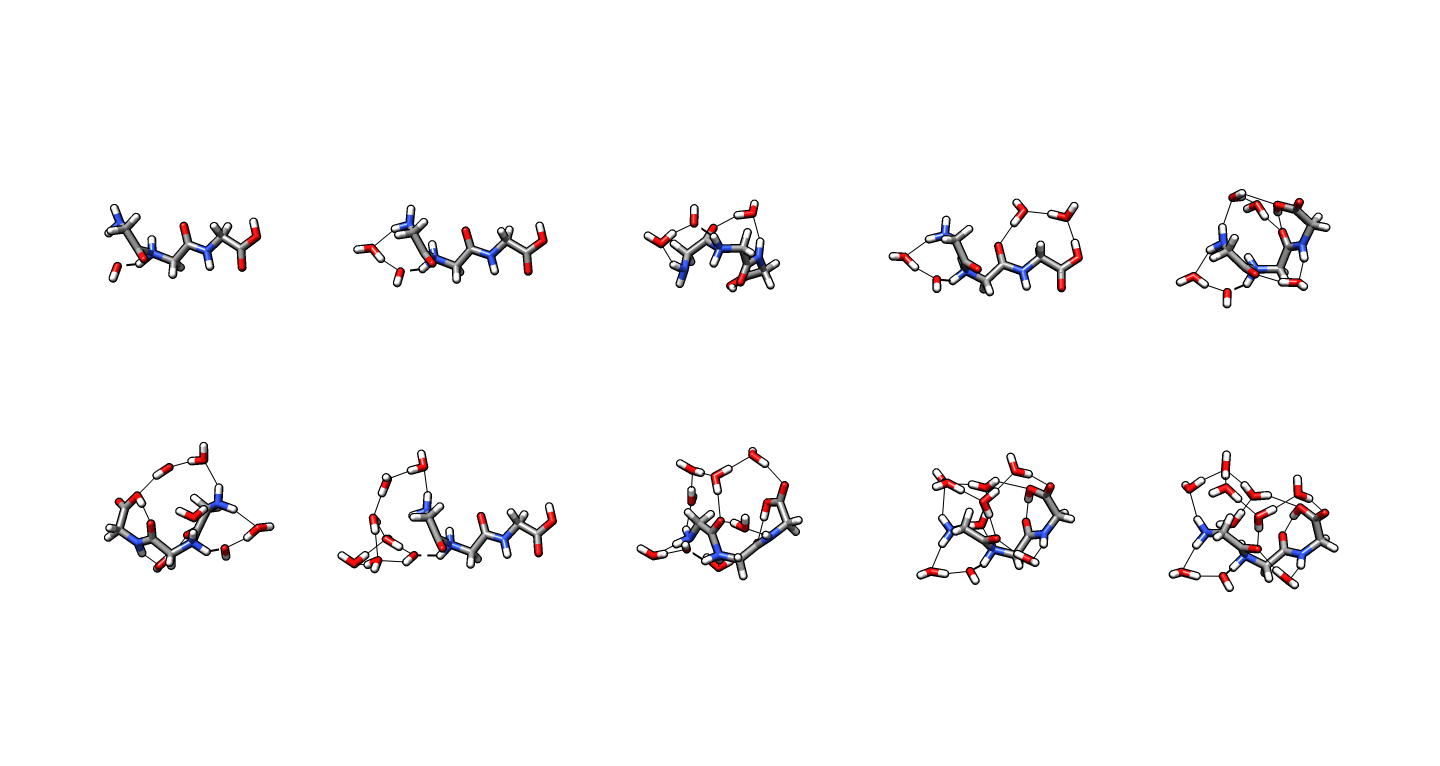


II-9W

II-8W

II-7W

II-6W

II-5W

II-1W

II-2W

II-4W

II-3W

II

Fig. S3. The structures of *trans* C-to-N triglycine transition states in nanoclusters of water (w=0-9)
